# Supplementary material for: In situgrown silver bismuth sulfide nanorod arrays and their application to solar cells
Source: Royal Society of Chemistry journal article supplement (doi:10.1039/c9ce00164f), 2019-01-01
Supplement: c9ce00164f1.pdf [file c9ce00164f1.pdf]

## Supporting Information

### In-situ growth of Silver Bismuth Sulfide Nanorod Arrays and Application to Solar Cells

Yulei Wu <sup>a, b</sup>, Li Wan <sup>a</sup>, Wenxiao Zhang <sup>a, b</sup>, Xiaodong Li <sup>a, b</sup> and Junfeng Fang <sup>\* a, b, c</sup>

*a* Ningbo Institute of Materials Technology and Engineering Chinese Academy of Sciences, Ningbo 315201, China.

*b* Center of Materials Science and Optoelectronics Engineering, University of Chinese Academy of Sciences, Beijing 100049, China.

*c* School of Physics and Materials Science, Ministry of Education Nanophotonics & Advanced Instrument Engineering Research Center, East China Normal University, Shanghai 200062, China

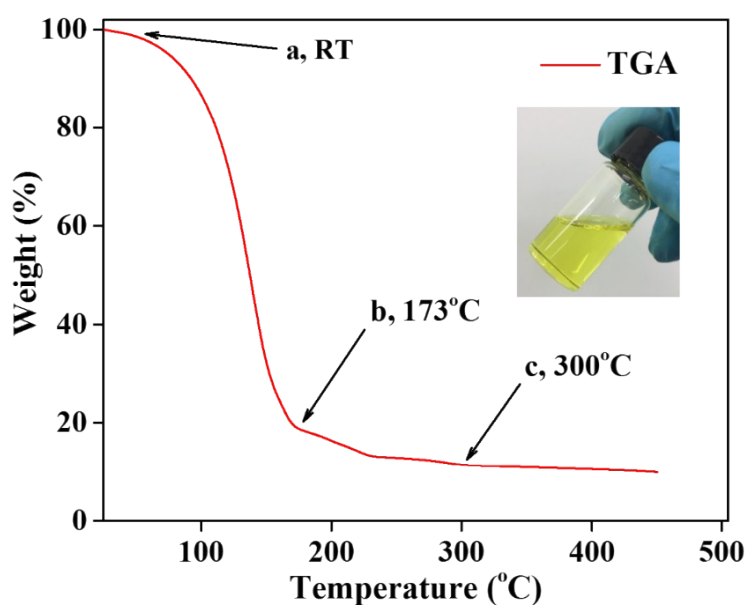

**Fig. S1** TGA curve obtained by in situ drying of the AgBiS<sub>2</sub> precursor solution. The concentration of AgBiS<sub>2</sub> precursor is 0.4M. From a to b, the weight was about 80% which equalled to the evaporation of solvent DMSO. The AgBiS<sub>2</sub> precursor decomposition and the thiourea evaporation/decomposition lead to the weight loss from b to c, about 10% remained at the flat range. Inset: a picture of AgBiS<sub>2</sub> precursor solution.

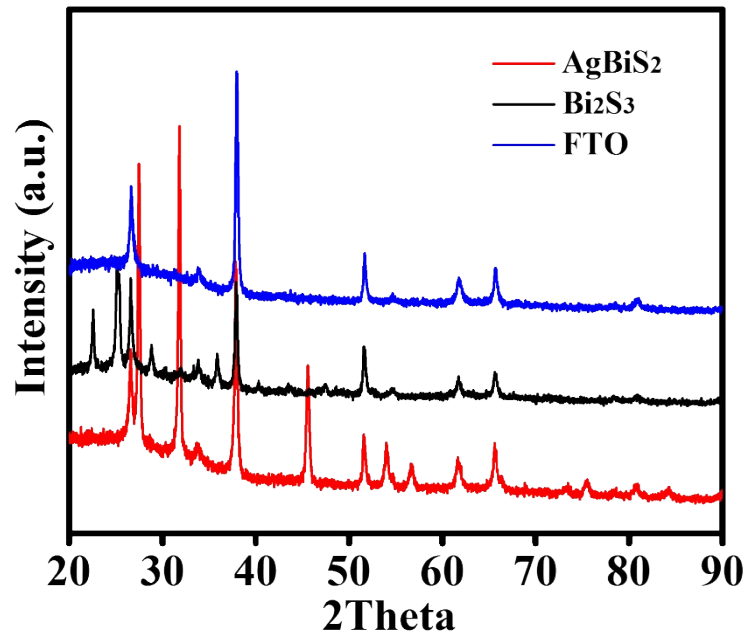

Fig. S2 XRD of AgBiS<sub>2</sub>, Bi<sub>2</sub>S<sub>3</sub> and FTO.

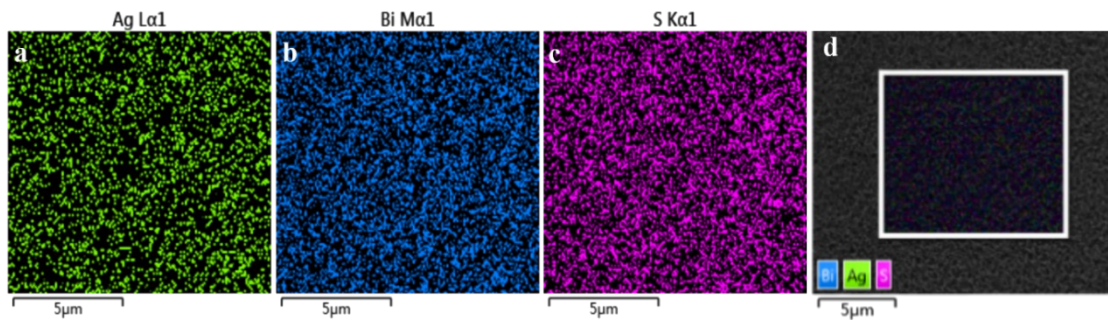

Fig. S3 EDX elemental mapping images of a) Ag, b) Bi, c) S corresponding to the white line square area in (d).

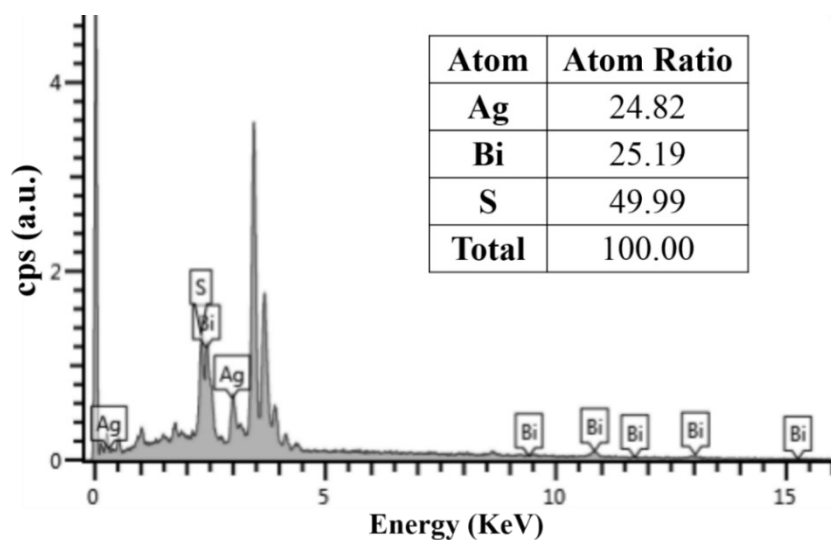

**Fig. S4** EDX spectrum of the AgBiS<sub>2</sub> nanorod-array film.

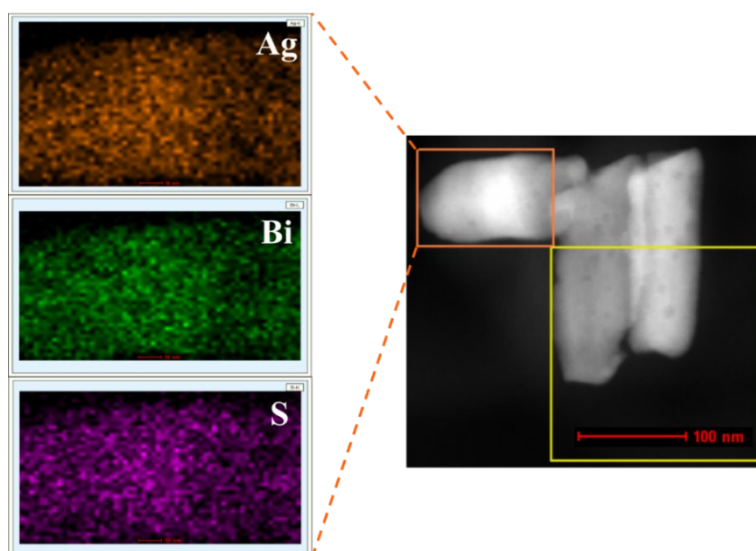

**Fig. S5** TEM-EDX distribution mapping for Ag, Bi, and S in an AgBiS<sub>2</sub> single nanorod.

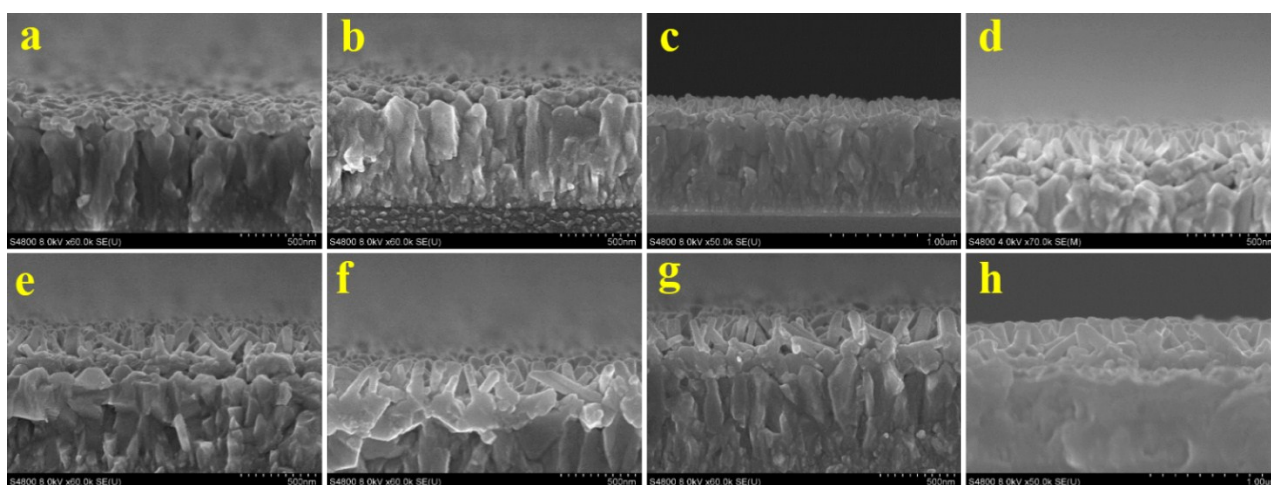

**Fig. S6** Cross-sectional SEM images of different spin loops for AgBiS<sub>2</sub> film on FTO: a) to h) corresponding to 1 spin loop to 8 spin loops.

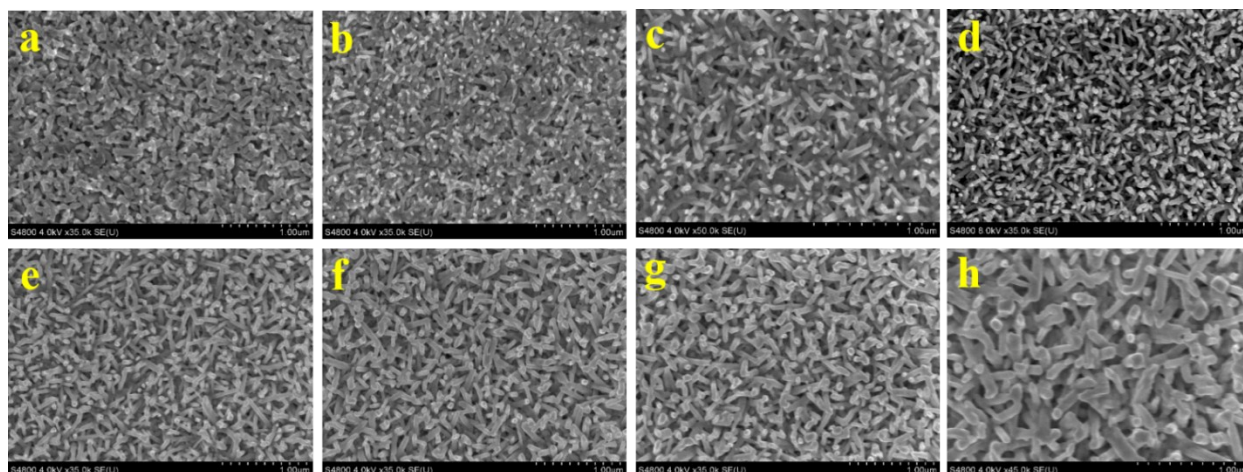

**Fig. S7** Top-view SEM images of different spin loops for AgBiS<sub>2</sub> film on FTO: a) to h) corresponding to 1 spin loop to 8 spin loops.

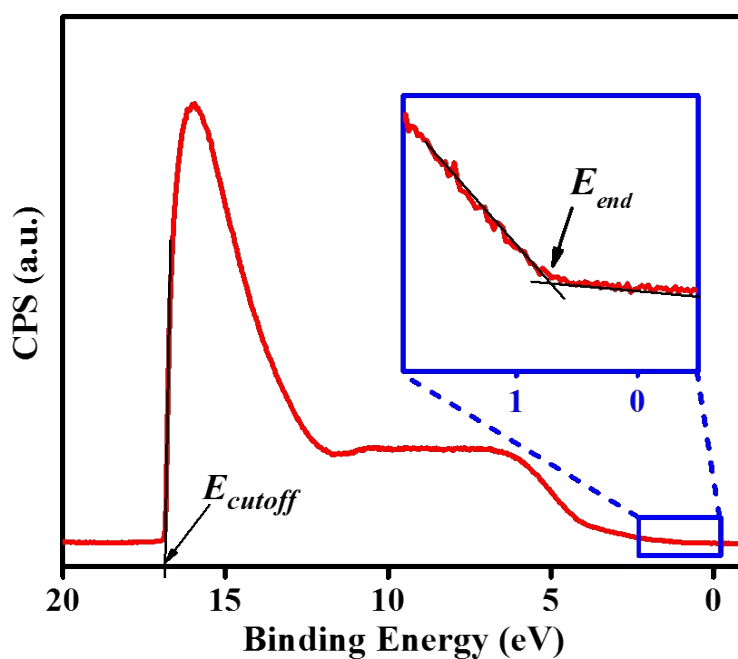

**Fig. S8** Ultraviolet photoelectron spectroscopy (UPS) is used to determine the Fermi energy ( $E_F$ ) and the valence band energy ( $E_v$ ) level or HOMO.  $E_F$  is calculated from the equation:  $E_F$  (Fermi energy) = 21.21 eV (He I) -  $E_{cutoff}$ . HOMO =  $E_F + E_{end}$ ; LUMO = HOMO -  $E_g$  (Band gap).

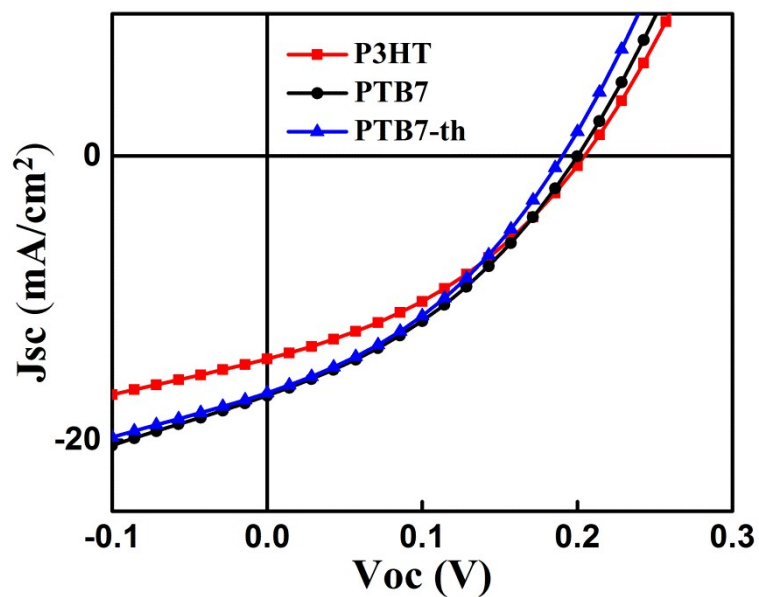

**Fig. S9** AgBiS<sub>2</sub> solar cells with P3HT, PTB7, PTB7-th as hole transport layers for comparison.

**Table S1** The parameters of AgBiS<sub>2</sub> solar cells with different hole transport layers.

| Material | V <sub>oc</sub> (V) | J <sub>sc</sub> (mA/cm <sup>2</sup> ) | FF (%) | PCE (%) |
|----------|---------------------|---------------------------------------|--------|---------|
| P3HT     | 0.211               | 15.679                                | 37.466 | 1.238   |
| PTB7     | 0.200               | 16.853                                | 35.605 | 1.199   |
| PTB7-th  | 0.190               | 16.644                                | 36.134 | 1.144   |
